# Supplementary material for: ZAXINONE SYNTHASE 2 regulates growth and arbuscular mycorrhizal symbiosis in rice
Source: PubMed Central journal article supplement (PMC9806602; doi:10.1093/plphys/kiac472), 2022-10-12
Supplement: kiac472_supplementary_data.pdf [file kiac472_supplementary_data.pdf]

## Supplementary Data

**Article title:** *ZAXINONE SYNTHASE 2* regulates growth and arbuscular mycorrhizal symbiosis in rice

**Authors:** Abdugaffor Ablazov<sup>1,2†</sup>, Cristina Votta<sup>3†</sup>, Valentina Fiorilli<sup>3</sup>, Jian You Wang<sup>1</sup>, Fatimah Aljedaani<sup>2,4</sup>, Muhammad Jamil<sup>1</sup>, Aparna Balakrishna<sup>1</sup>, Raffaella Balestrini<sup>5</sup>, Kit Xi Liew<sup>1</sup>, Chakravarthy Rajan<sup>1</sup>, Lamis Berqdar<sup>1</sup>, Ikram Blilou<sup>2,4</sup>, Luisa Lanfranco<sup>3</sup>, Salim Al-Babili<sup>1,2\*</sup>

The following Supporting Data is available for this article:

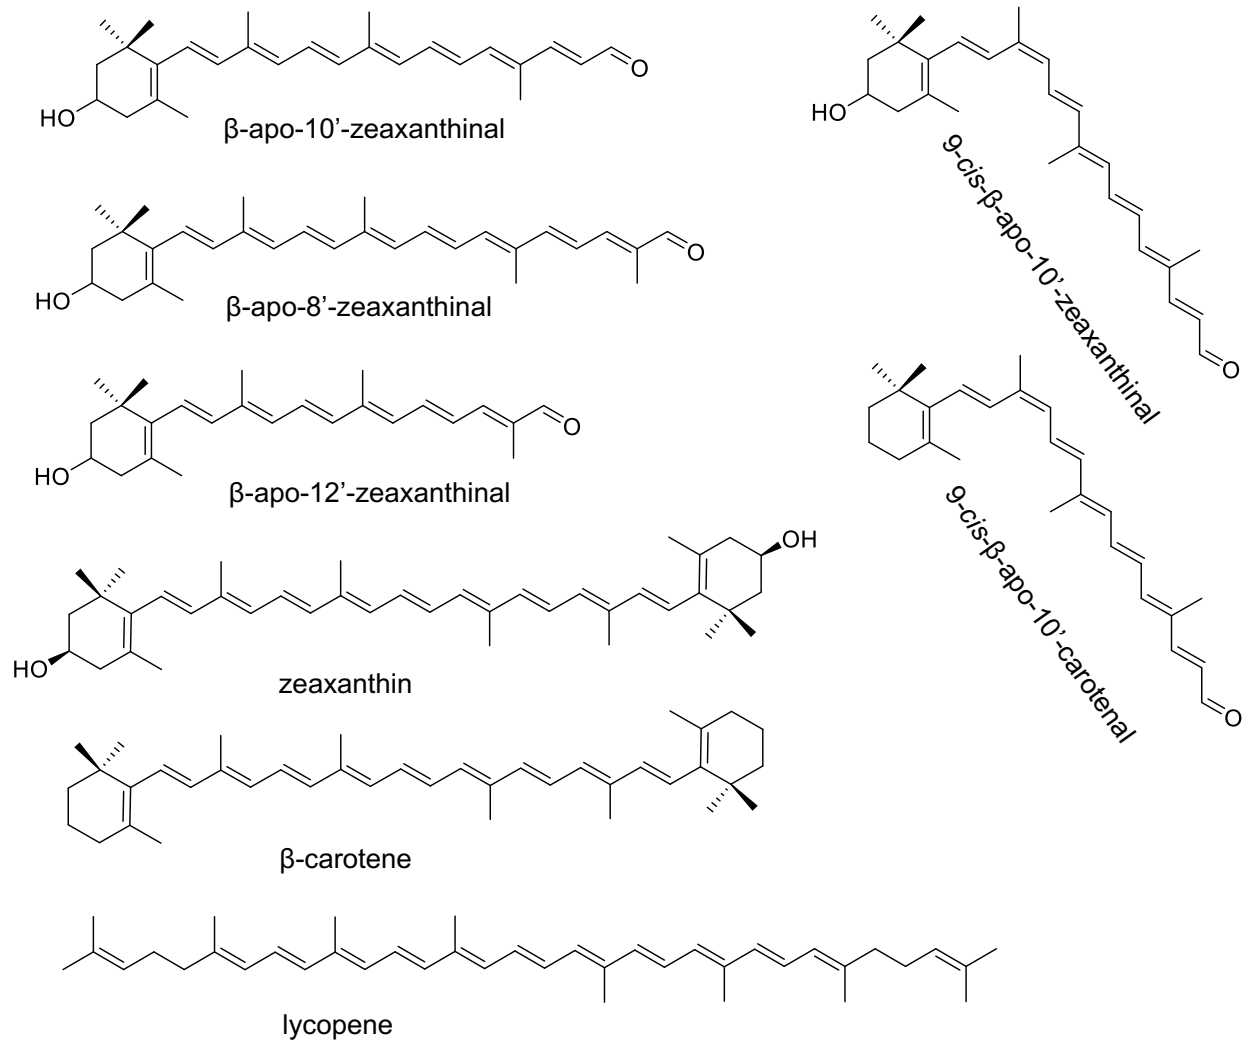

**Supplemental Figure S1.** Structures of carotenoids and apocarotenoids used as substrates in OsZAS2 *in vitro* and *vivo* assays.

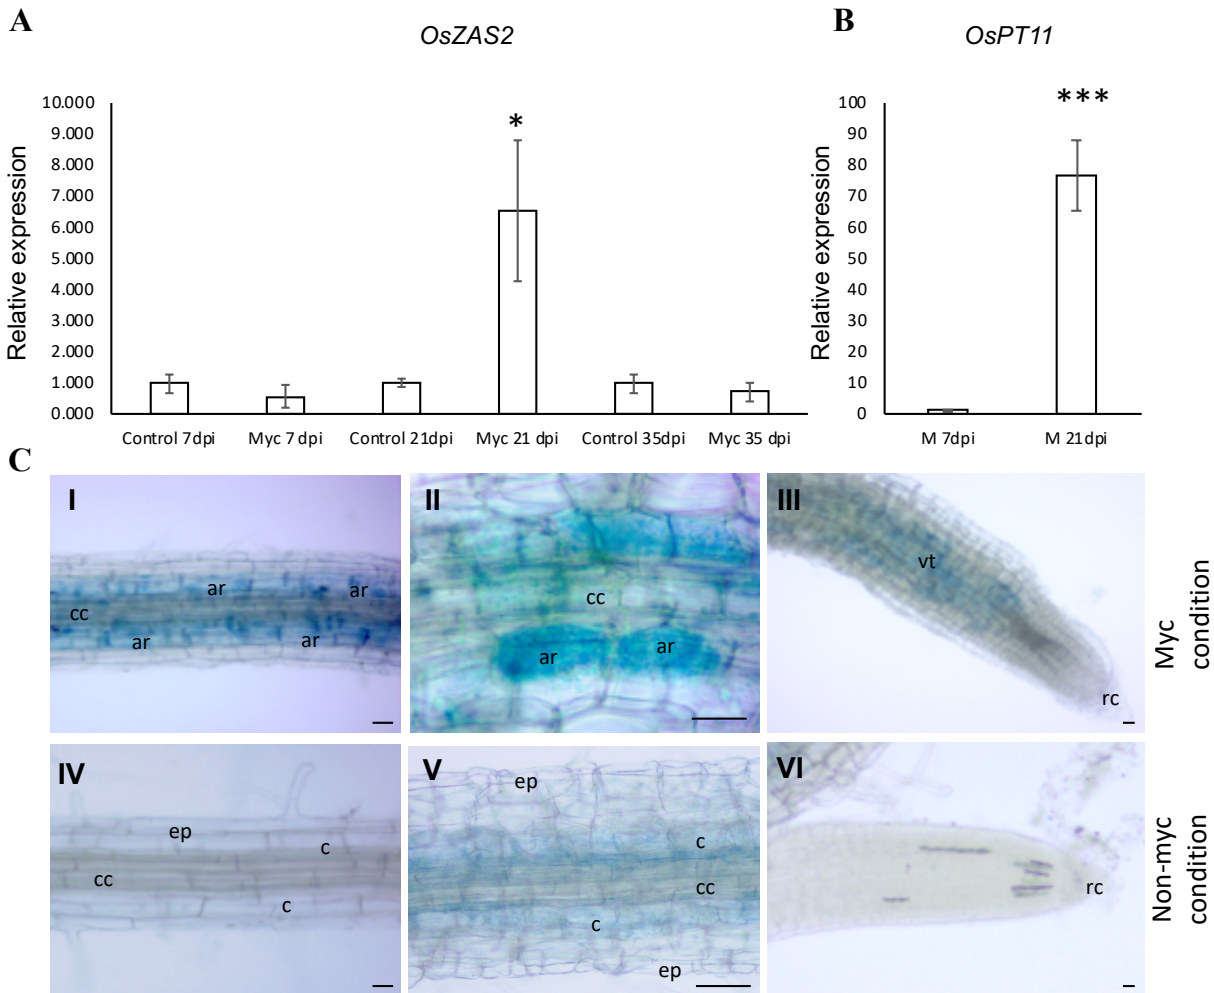

**Supplemental Figure S2.** *OsZAS2* expression during arbuscular mycorrhizal (AM) establishment. A, *OsZAS2* expression pattern at a different stage of mycorrhizal colonization (*R. irregularis*). B, *OsPT11* (AM marker gene) expression pattern at a different stage of mycorrhizal colonization (*R. irregularis*). C, GUS staining analysis of roots of *pZAS2:GUS-L11* reporter line inoculated (I, II, III) for 35 days with *F. mosseae* and non-inoculated (IV, V, VI). cc, central cylinder; c, non-colonized cortical cells; ep, epidermal cells; vt, vascular tissue; ar, arbuscule containing cells; rc, root cap; dpi, day post-inoculation. Bars in all panels correspond to 50  $\mu$ m. Values in (A-B) are means  $\pm$ SD ( $n \geq 3$ ) and student's t-test was applied for the statistical analysis (\* $P \leq 0.05$ ).

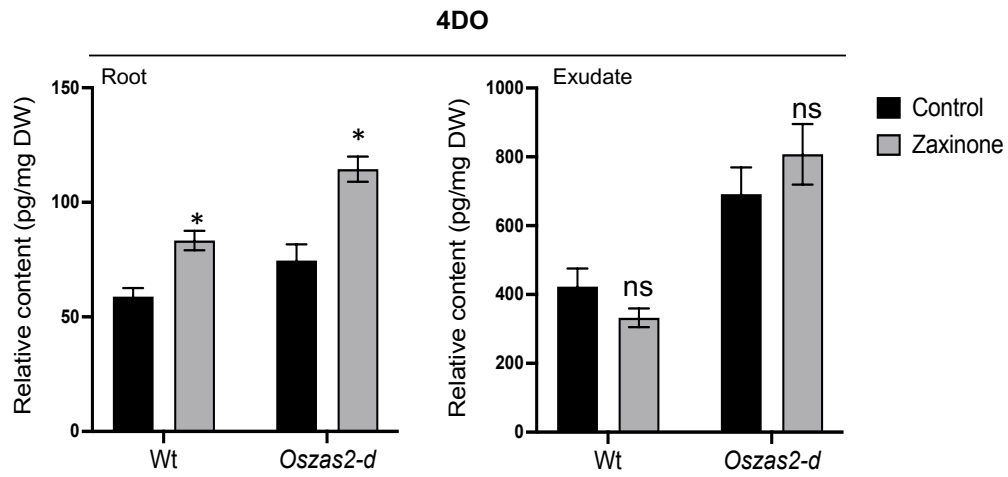

**Supplemental Figure S3.** Relative content of 4DO after zaxinone (5  $\mu$ M) treatment in root tissue and exudate of Wt and *Oszas2* mutant. DW, dry weight. Values are means  $\pm$ SD ( $n \geq 5$ ). Student's t-test was applied for the statistical analysis (\* $P \leq 0.05$ ; \*\* $P \leq 0.01$ ; ns: not significant).

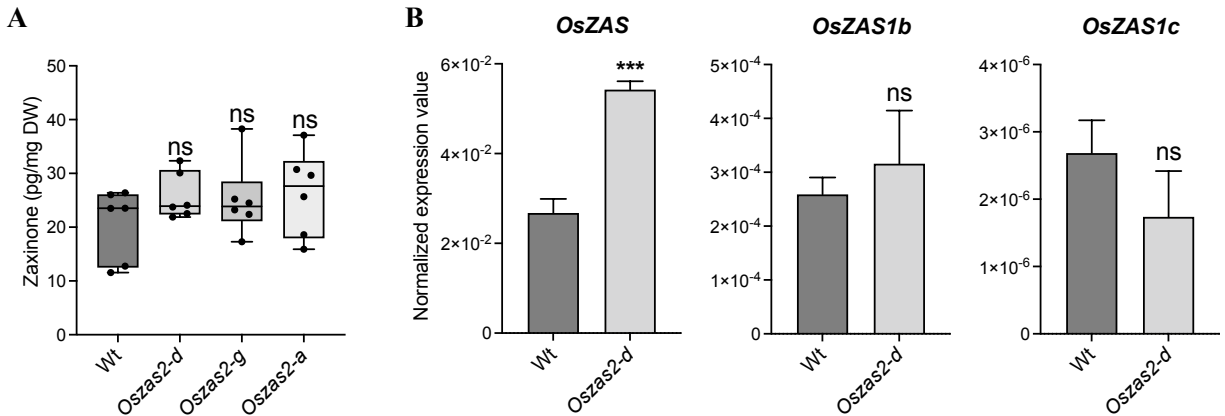

**Supplemental Figure S4.** Zaxinone quantification and *OsZAS* genes expression analysis in *Oszas2* mutants under low Pi conditions. A, Quantification of zaxinone content in Wt and *Oszas2* mutants roots under low Pi condition. Boxes in boxplots represent the median, first and third quartile. The minimum and maximum values are showed with the length of the whiskers. Dots represent the biological replicates. B, *OsZAS* genes expression analysis in Wt and *Oszas2-d* under low Pi condition. Values in (A-B) are means  $\pm$ SD ( $n \geq 3$ ) and student's t-test was applied for the statistical analysis (\*\*\*) $P \leq 0.001$ ; ns, not significant).

**Ref (Wt):** MFRAGGCSSQVTRCIHLGKSPADQASSLSPPNAVQSSVTGWNKQPLMQELTKALKSVSSDLLDRFIDSVYKFSEQPYLNE/---/PQRVPYGFHGNFFYK\* 593 aa  
**Ozas2-d:** MFRAGGCSSQVIHLGKSPADQASSLSPPNAVQSSVTGWNKQPLMQELTKALKSVSSAGPIHRLRVQVF\* 71 aa  
**Ozas2-g:** MFRAGGCIIHLGKSPADQASSLSPPNAVQSSVTGWNKQPLMQELTKALKSVSSDLLGASSTPCTSFSLSLI\* 73 aa  
**Ozas2-a:** MFRAGGCSSQMHSREEPS\* 20 aa

**Supplemental Figure S5.** Truncated amino acid sequences of *Ozas2* mutant lines after CRISPR-Cas9 genome editing. **aa, amino acid.**

OsZAS2 (tRNA-gRNA1-tRNA-gRNA2)

Standard synthesis of OsZAS2 (tRNA-gRNA1 -tRNA-gRNA2), including added 5'UTR (GGATGGGCAGTCTGGGCA) and 3'UTR (GTTTGCTGTCGCTCATCC) sequences, with sequence verification and custom cloning into pRGEB32 (Kanamycin) via 5'BsaI and 3'BsaI; delivered as a mini-scale DNA sample.

OsZAS2 (tRNA-gRNA1-tRNA-gRNA2)|Length: 391 |Vector: pRGEB32

```
GGATGGGCAGTCTGGGCAACAAAGCACCAGTGGTCTAGTGGTAGAATAGTACCCTGCCACGGTACAGACCCGGGTTCC
GATTCCCGGCTGGTGCAGATGAATGCATCTAGTGACC GTTTTAGAGCTAGAAATAGCAAGTTAAAATAAGGCTAGTCCGT
TATCAACTTGAAAAAGTGGCACCGAGTCGGTGCACAAAGCACCAGTGGTCTAGTGGTAGAATAGTACCCTGCCACGG
TACAGACCCGGGTTTCGATTCCCGGCTGGTGCAATCAGTCTTTCAGATCTGC GTTTTAGAGCTAGAAATAGCAAGTTAAA
ATAAGGCTAGTCCGTTATCAACTTGAAAAAGTGGCACCGAGTCGGTGC TTTTTTTTTT GTTTGCTGTCGCTCATCC
```

The sequences are annotated as follows:

Fok I site: green background and restriction site underlined

gRNA scaffold: yellow background

pre-tRNA: turquoise background

gRNA spacer: red letters

**Supplemental Figure S6.** gRNA targets of OsZAS2 were fused to tRNA sequences (Xie et al., 2015 ).

Supplemental File S1. Clustal alignment of ZAS members.

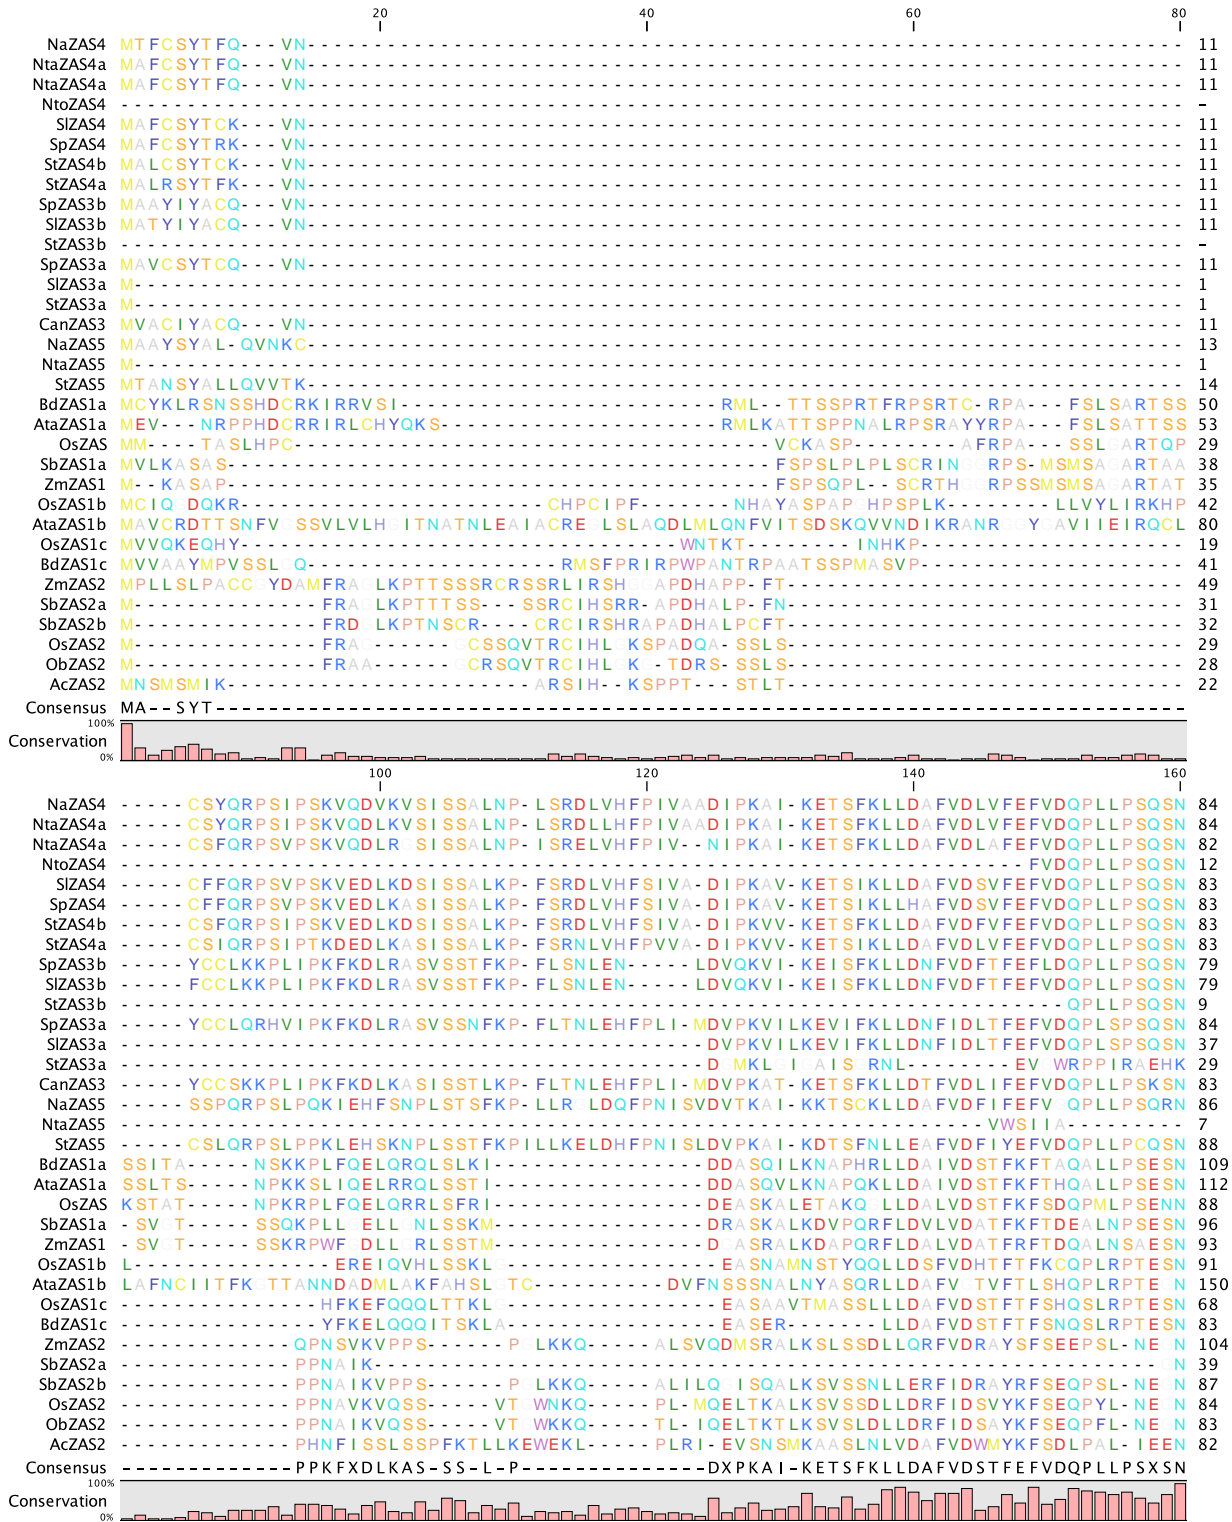



|           |                     |             |                      |            |                |           |
|-----------|---------------------|-------------|----------------------|------------|----------------|-----------|
|           |                     | 180         | 200                  | 220        | 240            |           |
| NaZAS4    | FAPVEEIEAVL--VTTVE  | K--IPDDFPE  | VYIRNSNPLFGLKSTKSI   | FKSSHVWIE  | EMLHALYFTKEK   | RT-159    |
| NtaZAS4a  | FAPVEENIEAVL--VTTAE | K--IPDDFPE  | VYIRNSNPLFGLKSTKSI   | FKSSHVWIE  | EMLHALYFTKEK   | RT-159    |
| NtaZAS4a  | FAPVEEIEAVL--VTTVE  | K--IPDDFPE  | VYIRNSNPLFGLKSTKSI   | FKSSHVWIE  | EMLHALYFTREKIR | T-157     |
| NtoZAS4   | FAPVEEIEAVL--VTTVE  | K--IPDDFPE  | VYIRNSNPLFGLKSTKSI   | FKSSHVWIE  | EMLHALYFTREKIR | T-87      |
| SIZAS4    | FAPVDEIEAVV--VTTVE  | K--IPDDFPE  | VYIRNSNPLFGLKSTKSI   | FKSSHVWIE  | EMLHALYFTREK   | RT-158    |
| SpZAS4    | FAPVDEIEAVV--VTTVE  | K--IPDDFPE  | VYIRNSNPLFGLKSTKSI   | FKSSHVWIE  | EMLHALYFTREK   | RT-158    |
| StZAS4a   | FAPVEEIEAVV--VTTVE  | E--IPDDFPE  | VYIRNSNPLFGLKSTKSI   | FKSSHVWIE  | EMLHALHFTREK   | RT-158    |
| StZAS4b   | FAPVEEIEAVV--VTTVE  | E--IPDDFPE  | VYIRNSNPLFGLKSTKSI   | FKSSHVWIE  | EMLHALHFTREK   | RT-158    |
| SpZAS3b   | FAPVEEIEAVK--VTTIQ  | K--IPNDFPE  | VYIRNSNPLFGLKSTKSI   | FKSSHVWIE  | EMLHALYFTKEK   | KNK-155   |
| SIZAS3b   | FAPVEEIEAVR--VTTIQ  | K--IPNDFPE  | VYIRNSNPLFGLKSTKSI   | FKSSHVWIE  | EMLHALYFTKEK   | KNK-155   |
| StZAS3b   | FAPVEEIEAVR--VTTIQ  | E--IPNDFPE  | VYIRNSNPLFGLKSTKSI   | FKSSHVWIE  | EMLHALYFTKEK   | KNK-155   |
| SpZAS3a   | FAPVEEIEAAR--VTTIQ  | K--IPNDFPE  | VYIRNSNPLFGLKSTKSI   | FKSSHVWIE  | EMLHALYFTKEK   | KINK-160  |
| SIZAS3a   | FAPVEEIEAVR--VTTIQ  | K--IPNDFPE  | VYIRNSNPLFGLKSTKSI   | FKSSHVWIE  | EMLHALYFTKEK   | KINK-113  |
| StZAS3a   | -SPKIELSSRM-        | -----       | RSNPLFGLKSTKSI       | FKSSHVWIE  | EMLHALYFTKEK   | -GNK-82   |
| CanZAS3   | FASVEEIEAIT--VTEIE  | K--IPDDFPE  | VYIRNSNPLFGLKSSKI    | FKSHLWIE   | EMLHALYFTKVK   | KS-159    |
| NaZAS5    | FAPVEIEEATTS-VTRVE  | M--IPDDFPE  | VYIRNSNPLFGLKSTRSI   | FESNHMWIE  | EMLHALYLKKNRIR | R-163     |
| NtaZAS5   | -----               | -----       | GNPLFGLKSTRSI        | FESDHMWIE  | EMLHALYLKKNRIR | S-51      |
| StZAS5    | FAPVEEIEEATT--VEIVE | K--IPDDFPE  | VYIRNSNPLFGLKSTRSI   | FESRHMWIE  | EMVHALYLKKNEN  | -GK-163   |
| BdZAS1a   | FAPVDEIESTEI--LQIE  | E--IPEDFPE  | VYIRNSNPLFGLHSTMSV   | FESNEIWE   | EMLHALYFTKNCS  | -AS-183   |
| AtaZAS1a  | FAPVDEIESEI--LQIE   | E--IPKDPE   | VYIRNSNPLFGLHSTVSV   | FESSEIWE   | EMLHALYFTKT    | S-ASS-187 |
| OzZAS1a   | FAPVNEISEAIEI--LQIE | E--IPDFPE   | VYIRNSNPLFGLHSTVSI   | FESSEIWE   | EMLHALYFTKN    | S-SDT-162 |
| SbZAS1a   | FAPVDEIEAIEIHQNV    | A--IPDDFPE  | VYIRNSNPLFGLHSTSSI   | FQSREIWE   | EMLHALYFTKNTS  | -GS-172   |
| ZmZAS1    | FAPVDEIEAIEIHQSQR   | A--IPDFPE   | VYIRNSNPLFGLHSTSSV   | FQSREIWE   | EMLHAVYFTKSS   | -GHL-170  |
| OzZAS1b   | FAPVDEIEITRV--IEIE  | E--IPADPE   | VYIRNSNPLFGLQSVSSI   | FQSHNIWE   | EMLHAVYFCKSN   | -NST-165  |
| AtaZAS1b  | FAPVEEIDVREI--FDIA  | E--IPADPE   | VYIRNSNPLFGLHSSSI    | FKSHDIWE   | EMLHAVYFTKSN   | -NNT-224  |
| OzZAS1c   | FAPVDEIEIRTEI--WRIE | T--ISDDFPE  | VYIRNSNPLFGLHKVNSI   | FQSEDIWE   | EMLHALYFTKRE   | -GNT-143  |
| BdZAS1c   | FAPVDEIEELTTI--LDIE | D--IPADPE   | VYIRNSNPLFGLHNVDSV   | FRENIWE    | EMVHAVYFCKSSM  | -GT-157   |
| ZmZAS2    | FRPVDEIDAVSLSSLD    | EEVVPADPE   | VYIRNSNPLNPTQVA      | SVFSTSYTYE | HMLHAVYFSRS    | -FAGS-183 |
| SbZAS2a   | FRPVNEMDEAVLLN--NLD | E--VPDFPE   | VYIRNSNPLNPTQIADSI   | FSTSYMYE   | HMLHAVYFDKSS   | -LIE-113  |
| SbZAS2b   | FRPVNEIDEAVLLN--SLD | Q--VPDFPE   | VYIRNSNPLNPTQIADSI   | FSTSYTYE   | HMLHAVYFNKSN   | -LIE-161  |
| OzZAS2    | FRPVNEIDEVFLD--DLN  | E--VPKDFPE  | VYIRNSNPLNPTQAAESI   | FPTSYMYE   | HMLHALYLSKSN   | -LIE-158  |
| ObZAS2    | FRPVDEIDEVLID--SLD  | E--VPADPE   | VYIRNSNPLNLSQAAAESM  | FSTSYMYE   | HMLHAVYFTKSS   | -IE-157   |
| AcZAS2    | FRPVDEIDVVLVH--NLE  | E--IPETPE   | VYIRNSNPLNPTQTTATSI  | FSTAYTYE   | DMLHATYFDKA    | N-GK-156  |
| Consensus | FAPVEEIEAVL--VTTIE  | GE--IPDDFPE | GVYIRNGSNPLFGLKSTKSI | FKSSHVWIE  | EMLHALYFTKEK   | G-X-      |

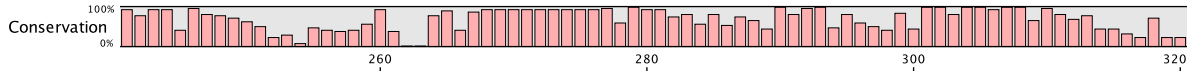

|           |                          |                    |                |             |            |                |                |          |         |     |
|-----------|--------------------------|--------------------|----------------|-------------|------------|----------------|----------------|----------|---------|-----|
| NaZAS4    | WNIFYNKKHVRTDTFKMEKDKK   | FLPAIE             | DSPAIIIVAYILN  | LRFMENKYL   | SNTNIFEH   | SKKYYSIAENHPQE | 237            |          |         |     |
| NtaZAS4a  | WNIFYNKKHVRTDTFKMEKDRKK  | FLPAIE             | DSSAIIIVAYILN  | LRFMENKYL   | SNTNIFEH   | SKKYYSIAENHPQE | 237            |          |         |     |
| NtaZAS4a  | WTFYNNKHVQTDTFKMEKDRKK   | FLPAIE             | DSPAIIIVAYILN  | LRFMENKYL   | SNTNIFEH   | SKKYYSIAENHPQE | 235            |          |         |     |
| NtoZAS4   | WTFYNNKHVRTDTFKMEKDRKK   | FLPAIE             | DSPAIIIVAYILN  | LRFMENKYL   | SNTNIFEH   | SKKYYSIAENHPQE | 165            |          |         |     |
| SIZAS4    | WNIFYNKKHVQTDTFKMEIHRKK  | FLPAIE             | DSPAIIIMAYILN  | LRFVENKYL   | SNTNIFEH   | SKKYYSIAENHPQE | 236            |          |         |     |
| SpZAS4    | WNIFYNKKHVQTDTFKMEIHRKK  | FLPAIE             | DSPAIIIMAYILN  | LRFVENKYL   | SNTNIFEH   | SKKYYSIAENHPQE | 236            |          |         |     |
| StZAS4a   | WNIFYNKKHVQTDTFKMEIHRKK  | FLPAIE             | DSPAIIIMAYILN  | LRFVENKYL   | SNTNIFEH   | SKKYYSIAENHPQE | 236            |          |         |     |
| StZAS4b   | WNTFYNNKHVRTDTFKMEIHRKK  | FLPAIE             | DSPAIIIMAYILN  | LRFVENKYL   | SNTNIFEH   | SKKYYSIAENHPQE | 236            |          |         |     |
| SpZAS3b   | WNIFYNKKYVETDTFNI        | EKDRKK--SII        | PNMEDLAVFMA    | ILLNVLRFV   | FHKYLSNTN  | FEH            | SKKYYSIAENHPQE | 233      |         |     |
| SIZAS3b   | WNIFYNKKYVETDTFNI        | EKDRKK--SIV        | PNMEDLAVFMA    | ILLNVLRFV   | FHKYLSNTN  | FEH            | SKKYYSIAENHPQE | 233      |         |     |
| StZAS3b   | WNILYKKNYVETDTFNM        | EKDRKK--SII        | PNMEDLAVFMA    | ILLNVLRFV   | FHKYLSNTN  | FEH            | SKKYYSIAENHPQE | 163      |         |     |
| SpZAS3a   | WNILYKKNYVETDTFNM        | EKNLKK--KFI        | PNIEDLAVLVA    | SLLNVMRFV   | LHKYLSNTN  | FEH            | SKKLYSIAENHPQE | 238      |         |     |
| SIZAS3a   | WNILYKKNYVETDTFNM        | EKNLKK--KFI        | PNIEDLAVLVA    | SLLNVMRFV   | LHKYLSNTN  | FEH            | SKKLYSIAENHPQE | 191      |         |     |
| StZAS3a   | WNILYKKNYVETDTFNM        | EKNLKN--FI         | PNIEDLAVLVA    | SLLNVMRFV   | LHKYLSNTN  | FEH            | SKKYYSIAENHPQE | 160      |         |     |
| CanZAS3   | WNVLYKKNYVETDTFNI        | EKNRKK--DFI        | PNMEDLAVLVA    | ATLLNLLRFV  | FHKYLSNTN  | FEH            | AKKYSIAENHPQE  | 237      |         |     |
| NaZAS5    | WNTLYKKNKHVQTDTYKMEKDRKK | FLPAIE             | DSPAIIIVAYILN  | LRFVIDKYL   | SNTNFEH    | AKKYSIAENHPQE  | 241            |          |         |     |
| NtaZAS5   | WNTLYKKNKHVQTDTYKMEKDRKK | FLPAIE             | DSPAIIIVAYILN  | LRFVIDKYL   | SNTNFEH    | AKKYSIAENHPQE  | 129            |          |         |     |
| StZAS5    | WKTIFYNKKHVQTD           | DSYMEKDRNK--FLPAIQ | DSPAIIISYLLN   | LRFMIDKYL   | SNTNFEH    | ANKYSIAENHPQE  | 241            |          |         |     |
| BdZAS1a   | WWSYANRYVQSETLKI         | EKAQK--CFLPAIE     | DSAAIIAAYILN   | LRFEVNKN    | SNTNFEH    | ARVYAV         | ESHQPE         | 261      |         |     |
| AtaZAS1a  | WWSYDNRYVQSETLKI         | EQDRK--CFLPAIE     | DSAAIIIVAYILN  | LRFKVNKN    | SNTNFEH    | ARVYAV         | ESHQPE         | 265      |         |     |
| OzZAS     | WWSYANRYVQSETLKI         | EKTQK--CFLPAIM     | DSAAIIAAYILN   | LRFKVNKN    | SNTNFEH    | AKVYAV         | SENHPQE        | 240      |         |     |
| SbZAS1a   | WWSYANRYVQSETLKI         | LETARQK--CFLPAIE   | DSAAIIAAYIFN   | LRFKVNKD    | SNTNFEH    | ARVFAV         | ENHPQE         | 250      |         |     |
| ZmZAS1    | WWSYASRYVQSETLE          | LETARHK--CFLPAVE   | DSAAIIAAYVFN   | LRFKVSKD    | SNTNFEH    | ARVFAV         | ENSLPYE        | 248      |         |     |
| OzZAS1b   | WSISYNNRYVQSETFR         | IEKERQK--CFLPMTD   | NPPAMLIA       | SVLNTLRFK   | VMSNTSV    | FEH            | ARVYAA         | SEDDV    | 243     |     |
| AtaZAS1b  | WSIKYTNRYVQSDTFR         | VENLKK--CFLPATD    | DPLAMLIA       | NLNTLRFK    | AFKNMSNTSV | FEH            | ARVFAV         | SAEND    | 230     |     |
| OzZAS1c   | WWSYNNRYVQSDTFNT         | ERDRQP--CFLSAIK    | DPLAIIIAASILN  | LRFKVFRMSNT | VF         | FEH            | ARVFAV         | ENSLPYE  | 221     |     |
| BdZAS1c   | WWSYANRYVQSDTFK          | RRQR--FALPAAT      | EPTAMLIA       | FALNMLRFK   | PFQNSNTSV  | FEH            | ARVY           | IAENHPQE | 235     |     |
| ZmZAS2    | WWSYRNKYVSDTLQL          | ERRKDD--VAFVPSVD   | QPYATLAA       | FALNMLRFK   | AVKDSANTN  | FEH            | ARFAV          | ENHPQE   | 263     |     |
| SbZAS2a   | WKISYRNKYVSDTFL          | ERKQK--VAFVPSAD    | QPYATLVA       | FVLNMLRFK   | AVKDSANTN  | FEH            | ARFAV          | ENHPQE   | 190     |     |
| SbZAS2b   | WKISYRNK-----            | -----              | -----          | -----       | F          | AVKDSANTN      | FEH            | ARFAV    | ESHLPYE | 200 |
| OzZAS2    | WRISYKKNYVDTDTFEL        | ERKKN--IAFLPSAE    | EPCATLVA       | FLLNTVRFK   | VPKDSANTN  | FEH            | ARFAV          | ENHPQE   | 236     |     |
| ObZAS2    | WRISYKKNYVDTDTFEL        | ERKKN--IAFLPSAE    | QPYATLAA       | FALNMLRFK   | VPKDSANTN  | FEH            | ARFAV          | ENHPQE   | 235     |     |
| AcZAS2    | WRISYKKNYVSDTFQME        | EKERNK--SFI        | PAVDQPHILAA    | FVFNMLRFK   | AVKDSANTN  | FEH            | ARFAV          | ENHPQE   | 234     |     |
| Consensus | WNIFYNKKYVQTDTFKMEKDRKK  | --GFLPAIE          | GDSPAIIIVAYILN | LRFGK       | ENKYL      | SNTNFEH        | AKKYSIAENHPQE  |          |         |     |

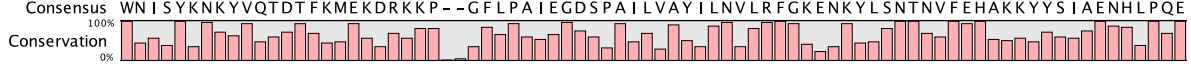

NaZAS4 IDISSLETLNWNIDAWDRPFTSHPKKAPTSELVIM IYPRKPYFELVISADKKMVHKVDLKFNRCSLCHIEIGV 315  
 NtaZAS4a IDISSLETLNWNIDAWDRPFTSHPKKAPS ELVIM IYPRKPYFELVISADKKMVHKVDLKFNRCSLCHIEIGV 315  
 NtaZAS4a IDISSLETLNWNINAWDRPFTSHPKKAPS ELVIM IYPRKPYFELVISADKKMVHKVDLNFNRCSLCHIEIGV 313  
 NtoZAS4 INISSLETLNWNINAWDRPFTSHPKKAPS ELVIM IYPRKPYFELVISADKKMVHKVDLNFNRCSLCHIEIGV 243  
 SIZAS4 IDIYSLLETLNWNVNAWNRPFTHSHPKKAPASELVIM IYPRKPYFEI VISADKKMVHKVDLKFNRCSLCHDMV 314  
 SpZAS4 IDIYSLLETLNWNVNAWNRPFTHSHPKKAPTSELVIM IYPRKPYFELVISADKKMVHKVDLKFNRCSLCHDMV 314  
 StZAS4b IDIYTLATLNWNVNAWDRPFTSHPKKAPTSELVIM IYPRKPYFELVISADKKMVHKVDLKFNRCSLCHDMV 314  
 StZAS4a IDIYSLLETLNWNVNAWSRPFTHSHPKKAPS ELVTM IYPRKPYFELVISADKKMVHKVDLKFNRCSLCHDMV 314  
 SpZAS3b INIQTLETLNWTIN DWTRSFTAHPKKIRDTELIVM TYPLKPYFELVISADKQMIHKVDLKLNRCSLCHIEIGV 311  
 SIZAS3b INIQTLETLNWTIN DWTRSFTAHPKKIRDTELIVM TYPLKPYFELVISADKQMIHKVDLKLNRCSLCHIEIGV 311  
 StZAS3b INIQTLETLNWTVNAWNRSFTAHPKKVPTELIVM TYPLKPYFELVISADKQMIHKVDLKLNRCSLCHIEIGV 241  
 SpZAS3a INIQTLETLNWTVNAWSQSFTHAHPKKILDT ELVIM INPLKPYLEL IISADKQMVHKVDVKNLNRCSLCHIEIGV 316  
 SIZAS3a INIQTLETLNWTVNAWSQSFTHAHPKKIPDT ELVIM INPLKPYLEL IISADKQMVHKVDVKNLNRCSLCHIEIGV 269  
 StZAS3a INIQTLETLNWTVNAWSQSFTHAHPKKIPDT ELVTM INPLKPYLEL IISADKQMVHKVDVKNLNRCSLCHIEIGV 238  
 CanZAS3 INIQTLETLNWTVNAWNRSFTAHPKKVPTELIVM TYPIKPYFELVISADKQMVHKVDLNFNCSLCHIEIGV 315  
 NaZAS5 IDIHSLETLENNVNTS SWTRPFTHSHPKKAPTSELVIM IYPRKPYFELVISADKEMVHKADLMFDRCTVCHIEIGV 320  
 NtaZAS5 IDIHSLETLENNVNTS SWTRPFTHSHPKKAPTSELVIM IYPRKPYFELVISADKKMVHKADLMFDRCTVCHIEIGV 208  
 StZAS5 IDIHSLETLENNVNTS SWTRPFTHSHPKKAPTSELVIM IYPRKPYFELVISADKKMVHKADLMFDRCAVCHIEIGV 320  
 BdZAS1a ICIQNLETNTWDIH EWDRPFTAHPKKVPVTELIVM SDAKKPFLLV VVSDDTKLKHKVDLKLDRCTLCHDIEIGV 339  
 AtaZAS1a ICIQNLETNTWDIH EWDRPFTAHPKKVPVTELIVM SDAKKPFLLV VVSDDTKLKHKVDLKLNRCSLCHDIEIGV 343  
 OsZAS ICIQNLETNTWDIH EWDRPFTAHPKKVPVTELIVM SDAKKPFLLV VVSDDTKLKHKVDLKLDRCTLCHDIEIGV 318  
 SbZAS1a IDLNLDTS TWDVCG EWDRPFTAHPKKVPVTELIVM SDAKKPFLLV VVSDDTKLKHKVDLKLDRCTLCHDIEIGV 329  
 ZmZAS1 ICVSLDTDAWVCG EWDRPFTAHPKKVPVTELIVM SDAKKPFLLV VVSDDTKLKHKVDLKLDRCTLCHDIEIGV 326  
 OsZAS1b VDLHNLSTL SWHLCG EWKLPFTAHPKKVPVTELIVM SDAKKPFLLV VVSDDTKLKHKVDLKLDRCTYCHIEIGV 321  
 AtaZAS1b IDLYSLTLSWNVDCG WKMPPFTAHPKKVPVTELIVM SDAKKPFLLV VVSDDTKLKHKVDLKLDRCTYCHIEIGV 380  
 OsZAS1c IDLDNLTLCSSWVDCG WQNMPPFTAHPKKVPVTELIVM SDAKKPFLLV VVSDDTKLKHKVDLKLDRCTYCHIEIGV 299  
 BdZAS1c IDLQNLDTV RHDFCG DWNTPCSTSHPKKVPVTELIVM SDAKKPFLLV VVSDDTKLKHKVDLKLDRCTYCHIEIGV 313  
 ZmZAS2 INISNLSTL PYSVNAWNRPFTHSHPKKIQSELVMM TNEKPYVYL VISSDERLVHKVDLKFEEKLHIDIEIGV 341  
 SbZAS2a INISNLSTL PYSVNAWNRPFTHSHPKKIQSELVMM TNEKPYVYL VISSDERLVHKVDLKFEEKLHIDIEIGV 268  
 SbZAS2b ININLNTL PYSVNAWNRPFTHSHPKKIQSELVMM TNEKPYVYL VISSDERLVHKVDLKFEEKLHIDIEIGV 278  
 OsZAS2 IDINLRTLPYINNAWDRPFTSHPKKICSELVMM TNEKPYVYL VISSDERLVHKVDLKFEEKLHIDIEIGV 314  
 ObZAS2 IDINLRTLPYINNAWDRPFTSHPKKICSELVMM TNEKPYVYL VISSDERLVHKVDLKFEEKLHIDIEIGV 313  
 AcZAS2 IDIATLDTV LYNVYAWNRPFTHSHPKKAPRTELIVM SDVVRKPHFVL IISADKNLLHKVNLLEYESKLHIEIGV 312  
 Consensus IDIQXLETLGNNVNGAWRPFTHSHPKKAPGXELVIM IYPRKPYFELGVISADGKMKVHKVDLKFNRCSLCHIEIGV

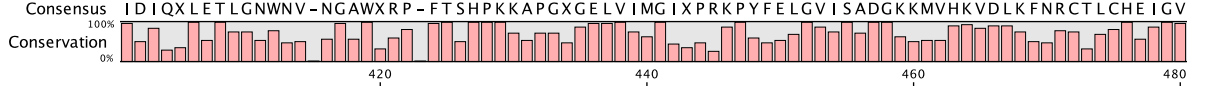

NaZAS4 TQKY--NVIMDFPLTIDINRLFMDSL IKYDKD YARI VMPRY DANSVKWFEVQPCCVLHLVNC FEDNDEVVVRACRA 393  
 NtaZAS4a TQKY--NVIMDFPLTIDINRLFRDSL IKYDKD YARI VMPRY DANSVKWFEVQPCCVLHLVNC FEDNDEVVVRACRA 393  
 NtaZAS4a TQKY--NVIMDFPLTIDINRLFRDPLIKYDKD YARI VMPRY DANSVKWFEVQTCV LHLVNC FEDNDEVVVRACRA 391  
 NtoZAS4 TQKY--NVIMDFPLTIDINRLFRDPLIKYDKD YARI VMPRY DANSVKWFEVQTCV LHLVNC FEDNDEVVVRACRA 321  
 SIZAS4 TERY--NVIMDFPLTIDINRLIRDSL IKYDKD YARI VMPRY DANSVRWFVQPCV FHLINCFEDNDEVVVR CRA 392  
 SpZAS4 TERY--NVIMDFPLTIDINRLIRDSL IKYDKD YARI VMPRY DANSVRWFVQPCV FHLINCFEDNDEVVVR CRA 392  
 StZAS4b TERY--NVIMDFPLTIDINRLIRDSL IKYDKN YARI VMPRY DANSVRWFVQPCV FHLINCFEDNDEVVVR CRA 392  
 StZAS4a TQRY--NVIMDFPLTIDINRLIRDSL IKYDKD YARI VMPRY DANSVRWFVQPCV FHLINCFEDNDEVVVR CRA 392  
 SpZAS3b TKRY--NVILD FPLTMDLKRLLIEELIKYNE D YARI IMPRY DANSIKWFEVEPCVYFHLINCFEDNDEVVVRACRA 389  
 SIZAS3b TKRY--NVILD FPLTMDLKRLLIEELIKYNE D YARI IMPRY DANSIKWFEVEPCVYFHLINCFEDYDEVVVRACRA 389  
 StZAS3b TKRY--NVILD FPLTMDLKRLLIEELIKYNE YARI IMPRY DANSIKWFEVEPCVYFHLINCFEDNDEVVVRACRA 319  
 SpZAS3a TKRY--NVILD FPLTIDLNRLLIEQLIKYDKD YARI IMPHY DANSIKWFEI EPCCVFHI INCFEDNDEVVVRACRA 394  
 SIZAS3a TKRY--NVILD FPLTIDLNRLLIEQLIKYDKD HARI IMPHY DANSIKWFEI EPCCVFHI INCFEDNDEVVVRACRA 347  
 StZAS3a TKRY--NVILD FPLTIDLNRLLIEQLIKYDKD YARI IMPRY DANSIKWFEI EPCCVFHI INCFEDNDEVVVRACRA 316  
 CanZAS3 TERY--NVILD FPLTIDLNRLLIRKQLIEYDE D YARI IMPRY DANSIKWFEVEPCVYFHLINCFEDKDEVVVRACRC 393  
 NaZAS5 TERY--NVIMDFPLTIDISRLVLSGLMRFEEN YARI IMPRY DANSIKWFEVEPCVYFHI INCFEDNDEVVVRACRA 398  
 NtaZAS5 TQRY--NVIMNFPLTIDISRLVLSGLMRFEEN YARI IMPRY DANSIKWFEVEPCVYFHI INCFEDNDEVVVRACRA 286  
 StZAS5 TQRY--NVIMNFPLTIDISRLVLSGLMRFEED YARI IMPRY DANSIKWFEVDPCCVYFHI INCFEHNDEVVVRACRA 398  
 BdZAS1a TLKY--NIIIDLPLTIDIRLTTQLIEYEKE YARI IMPRY DAESVWVFEVEPELCMFHLINCFED EEEVVQLRS 417  
 AtaZAS1a TLKY--NIIIDLPLTIDIRLTTQLIEYEKE YARI IMPRY DAESVWVFEVEPELCMFHLINCFEE DEEEVVQLRS 421  
 OsZAS TVKY--NIIIMDIPLTIDISRLIRNQLIKFEKDSYARI VMPRY DAESVWVFEVEPELCMFHLINCFEE DEVVIR FRA 396  
 SbZAS1a TLKY--HNVIDMIPLTIDISRLVLSGLMRFEEN YARI VMPRY DADSVWVFEVEPELCMFHLINCFEE DEEEVVQLRS 405  
 ZmZAS1 TPK--HNVIDMIPLTMDV RIVKQLIQFEKESYARI VMPRY DADSAIWFDEVEPELCMFHLINCFEE DEVVQALRS 404  
 OsZAS1b TTY--NIIIDISPLTLNPTRMRLR APLVLEFEFEESYRI VMPHY DADSVIWFVVEPEFCFHLVNC FEEHEVVVR FHV 399  
 AtaZAS1b TTTY--NIIIDISPLTINKERMLK ALLIEFEKDSYARI VMPHY DANSITWFVVEPEFCFHLVNC FEEDDEVVVR FHV 458  
 OsZAS1c TKMY--NIIIMDPLTVDLTRLR APLIDFETESYARI VMPRH DADSVIWFDEVEPEFCFHLINCFEEDHEVVIR FRV 377  
 BdZAS1c TTTY--NIIIMDTPLTVPNRRMLR APLIDYDKESYARI VMPRY DANSVWVFEVEPEFCFHLVNC FEEDDEVVIR IRV 391  
 ZmZAS2 TKRY--NIIIMDHPLKFI SRVFLKKPLIENDM KSRF VMPRF DAESIWFDEVENHCSYHLFNCFED NEVVIR CRL 419  
 SbZAS2a TKRY--NIIIMDYPLRFISRTFLRKPFIENDM KSRF VMPRF DAESIWFDEVENHCSYHLFNCFED NEVVIR CRL 346  
 SbZAS2b TKRY--NIIIMDYPLRFISRTFLRKPFIENDM KSRF VMPRF DAESIWFDEVENHCSYHLFNCFED NEVVIR CRL 356  
 OsZAS2 TAQY--NIIIMDYPLRFISRTFLRKPFIENDM KSRF VMPRF DAESIWFDEVENHCSYHLFNCFED NEVVIR CRT 392  
 ObZAS2 TAQY--NIIIMDYPLRFISRTFLRKPFIENDM KSRF VMPRF DDDSIWFDEVENHCSYHLFNCFED NEVVIR CRT 391  
 AcZAS2 TKNY--NIIIMDYPLRFIDRVLKQFIHQHDTNARSI VMPRF DAKSTSWFDEVENHCSYHLINCFEEHEVVVR CRI 390  
 Consensus TKRY--NVIMDFPLTIDINRLIRGDQLIKYDKDGYARIGVMPRYGDANSIKWFEVEPCCVFHLINCFEDNDEVVVRGCRA

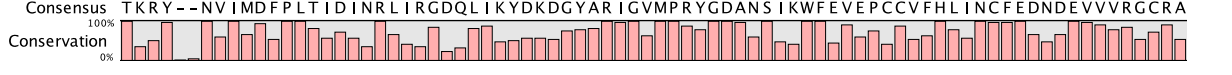

500 520 540 560

NaZAS4 SESVLPRL-----QQSFKSKEISSA--ENNNEYSDEPF-FVHVCEWRLNMRT EVKEKNATTE---FSMEFPMINEK 459  
 NtaZAS4a HESVLPRL-----QQSFKSKEISSI--ENNNESSVEPF-FVHVCEWRLNMRT EVKEKIATTE---FSMEFPMINEK 459  
 NtaZAS4a RESVLPRL-----QQSFKSKEISSI--ENNNESSVEPF-FVHVCEWRLNMRT EVKEKNATTE---FSMEFPVINEK 457  
 NtoZAS4 RESVLPRL-----QQSFKSKEISSI--ENNNESSVEPF-FVHVCEWRLNMRT EVKEKNATTE---FSMEFPVINEK 387  
 SIZAS4 RESVLPRLP SKDEKYKRFFEESEETSS--KINNESLEESF-FYRVCEWRLIMRT EVKEKNVITN---FFMEFPMINEK 466  
 SpZAS4 RESVLPRLP SKDEKYKRFFEESEETSS--KNNNESLEELF-YFRVCEWRLNMRT EVKEKNVITK---FFMEFPMINER 466  
 StZAS4b RESVLPRLP YKDKSKRFFE FEETSS--KNNNESLEESF-FYRVCEWRLNMRT EVKEKNVITK---FFMEFPMINEK 466  
 StZAS4a RESVLPRLP SKVKEFERFSK SEETSS--KINNESLEESF-FYRVCEWRLNMRT EVKEKNVITN---FFMEFPMINEK 466  
 SpZAS3b RRWIIIPRPN----ESELSDLT LNETSFS--KDNIESSKDLFFFVCEWRLNMKT EVKMKNLTTNDHRFIMEFPMINEH 463  
 SIZAS3b RRWIIIPRPN----ESELSSDT LNETSFS--KDNIESSKDLFFFVCEWRLNMKT EVKMKNLTTNDHRFIMEFPMINEH 463  
 StZAS3b RRWIIIPRPN----ESELSDLT LNETSFS--KNNIESSKDLFFFVCEWRLNMKT EVKMKNLTKNNHRFIMEFPMINEH 393  
 SpZAS3a RKSIIPRPDIIVDDL LSLDALNEMSF--KDNIKT SKDLFSFVCEWRLNMKT EVKMKNLTTNDHRFLMEFPMINEH 472  
 SIZAS3b RKSIIPRPDIIVDEL LSLDALNEMSF--KDNIKT SEDLFSFVCEWRLNMKT EVKMKNVTTNDHRFIMEFPMINEH 425  
 StZAS3a RRSIIPRPDIIVDEFLSLDELDMNFS--KNNVQMLKEIFSFVCEWRLNMKT EVKLLKDDSTTTHQFIMEFPMINEH 394  
 CanZAS3 RRWIIIPRNLTI DEAE LSLDSSNEMSF--KDDVQSSKDLFFFVCEWRLNMITSAVKMKNQTTADHQFIMEFPIINEH 471  
 NaZAS5 RQSVIIP PNRVNHFE---KWLK RSSK--DDRLEFTKES-TFPRVCEWRLNMKT EVRVKKNLS D- EFAMEFPIINEK 471  
 NtaZAS5 RQSVIIP PNRVNHFE---KWLK RSSK--DERLEFTKES-TFPRVCEWRLNMKT EVREKKNLS D- EFAMEFPIINEK 359  
 StZAS5 RQSVIIP PSSSVNHLET LSKWIKRETSSIDDDSHFTKES-TFPRVCEWRLDMKT EIKKKNLS D- EFAMEFPIINEK 476  
 BdZAS1a ADSIIPRRLRLSKHDMPPERSELTRY--KTMKQ INEKL-FSRLYEWRLNLKTKTIS EYLT TE--FSLEFPMINNH 492  
 AtaZAS1a ADSIIPRRL--NKQELIPERSELKDD--KAMKQ INEKL-FSRLEWRLNLKTKTVS EYLT TE--CSLEFPMINNH 494  
 OsZAS1a ADSIIPRRLSLNKNL LLDSPSKC-----SVKQ INEEF-FSRLYQWRLNLT KTKAVS QYLS TE--FSMEFPVINDK 466  
 SbZAS1a PDSIIPRRLAPNKC-----SKMSELTEDD--KP-NE TTKEF-FRRLYQWRLNLKTKSVS EYLT TE--FSFEFPIINNQ 477  
 ZmZAS1 PDSIIPSTIALDKLD--SEMPEVA DD--KPAKRPTAEF-FRRLYQWRLNLRTRSVS EYLS TD--YSLFPIISSQ 477  
 OsZAS1b PSSAIPRQKNMVMDDT-SS-----QEPNEEN-FSRLYEWRLNLKTRTVA KYLTSLD--VALEFPVINDK 461  
 AtaZAS1c PDSIIPRILPK-----SN-----Q LTKEC-FSRLYEWRLNLKTRTVV KCLT KE--VALKFPVINDK 514  
 OsZAS1c PDSIIPITILEHTANEEEPAN-----Q PSEKS-FRRLYEWRLNMKSRVAVT KYLT TD--VALEFPVINDK 440  
 BdZAS1c PPSVLV LNQAHLT SAN--D-----Q TDEEY-FSRLYEWRLNLKT AVK KYIT KD--VALEFPVINDQ 452  
 ZmZAS2 LLSILPSP RHRADKSKWY RAFLQPKD--SED FPDPSLD ILFSRYPYEWRLNLENHVSVEE YITSE--KVAMDFPVINDK 495  
 SbZAS2a LLSILPSP RHRVDKSKWY RAFLQPKD--SED FPDPSLD TLFSRYPYEWRLNLEN SVHE YITSE--KVAMDFPVINDK 422  
 SbZAS2b LASLIPSH-----ED--SED FPDPSLD TLFSRYPYEWRLNLENSIVGEDYITSE--KIAMDFPVINDK 415  
 OsZAS2 LDSVLSASHDDDKSKCS RAFLQPKDN--SE FDPSPD TLFSRYPYEWRLNLSK TTKE YLTDE--KVAMDFPVINDK 468  
 ObZAS2 LDSVIPS RHNADKSKCY RAFLPADKN--LQ FDPSPD TLFSRYPYEWRLNLKD TTKE YLTNE--NVAMDFPVINDK 467  
 AcZAS2 LCSVIP PDHKTDKAKWYQRAFLQPKD--SKE FDPSPD ILFSRYPYEWRLD LVT EVEE YITCE--EVAMDFPIINNH 466

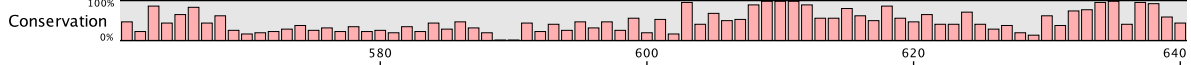

580 600 620 640

NaZAS4 FV L R N K F Y L Q V V D L E A S S ----- I S E L A K Y G L A K L H F Q E ----- Y E E L V E V E Y H M F P K T F C S A T F V 521  
 NtaZAS4a FV L R N K F Y L Q V V D L E A S S ----- I S E L A K Y G L A K L H F Q E ----- Y E E L V E V E Y H M F P K T F C S A T F V 521  
 NtaZAS4a FV L R N R F Y L Q V V D L E A S S ----- I S E L A K Y G L A K L H F K E ----- D E E L A K V E Y H M F P K T F C S A T F V 519  
 NtoZAS4 FV L R N R F Y L Q V V D L E A S S ----- I S E L A K Y G L A K L H F K E ----- D E E L A K V E Y H M F P K T F C S A T F V 449  
 SIZAS4 F I L K N K F C Y L Q V V D I E A S S ----- I S D L V K Y G L A K F Q F E D ----- D M E L I K V E Y H M L A E N F C S T T F V 528  
 SpZAS4 F I L R N K F C Y L Q V V D I E A S S ----- I S D L V K Y G L A K F Q F E E ----- D M E L I K V E Y H M L A E N F C S T T F V 528  
 SIZAS4b F I L R N K F C Y L Q V V D R E A S S ----- I S D L V K Y G L V K L Q F E E ----- D M E L I K V E Y H M L P E N F C S R T T F V 528  
 StZAS4a F I L K N K F C Y L Q V V N N E V S S ----- I S D L V K Y R L A K L Q F E E ----- D V E L I K V E Y H M L P E N F C S T T F V 528  
 SpZAS3b F I I K N K F Y Q L I N S E T F S N S - A K N L S G F A K F G L A K L N F E E I --- S K D D K K --- D L I K V E Y H I F P K N T F C S A T F V 536  
 SIZAS3b F I L K N K F Y Q L I N L E T F S N S - A K N V S G F A K F G L A K L N F E E I --- S K D D K K --- D L I K V E Y H I F P K N T F C S A T F V 536  
 StZAS3b F I S L K N K F Y Q L V N S E T F F N S - A K N L S G F A K F G L A K L H F E E I --- S K D I K E E E - D L I K V E Y H I F P K N T F C S A T F V 467  
 SpZAS3a F I I K N K F Y L Q L I D S E A F S N Y F A K T L S G F A K F G L A K L N F E E I --- S K D I K E E E - D L I K V E H H I F P K N T F C S A T F V 547  
 SIZAS3a F I L K N K F Y L Q L I D S E A F S N Y F ----- G F A K F G L A K L N F E E I --- S K D F K E E E - D L I K V E Y H I F P K N T F C S A T F V 495  
 StZAS3a F I I K N K F C Y L Q L I D S E A F S N Y F A K N L S G F A K F G L A K L H F E E R H V E N S K D N K E E E - D L I K V E Y H I F P K N T F C S A T F V 473  
 CanZAS3 F I I K N K F Y V Q L F N S E T Y S N S - G Y L P G F A K F G L A K L H Y E E R Q F E I S K D D K Q E E Y D L I K V E Y H I F P K N T F W S A A F V 550  
 NaZAS5 FT FRNKFA Y L Q V V E S T E I S ----- S F T R F S L T K L H F E E K R - I P T ----- E E E D E L I K A E Y H M L P N N T F C S A S F V 539  
 NtaZAS5 FT FRNKFA Y L Q V V E S T E I S ----- S F T R F S L V K L H F E E K R - I P T ----- E E E D E L I K A E Y H M L P Q N T F C S A S F V 427  
 StZAS5 FS FRNKFA Y L Q V V E S T E L S ----- S F T R F S L V K L H F E E K K T F N M ----- D E E D E L I K A E Y H M F P K N T F C S T S F V 545  
 BdZAS1a YT V H H S Y A Y A Q I V D S L T R P D S H E K V L --- P K Y G F A K I C L A D R Q N V N K E --- T S E - E D L I K M E K H W L E D Q F C S A S F V 566  
 AtaZAS1a YT V R H S Y A Q I V D S L T R S A S S S E K V L --- P K Y G F A K L C L E E R E N T - E - T S A - E D L I K M E I H R L S E D F C S A S F V 566  
 OsZAS Y T L H H S Y A Y A Q V V D S L E S S Y V N E K V I --- L K Y G L A K L C L E E A D N V I A E - T S - E D L I K T E Y H F E D Q F F S A A F V 539  
 SbZAS1a YT L Q H S Y A Y A Q I V D S G E N C --- K V N --- P K Y G F A K F Y L D E R N N ----- 517  
 ZmZAS1 YT L Q H R Y A Y A Q V V D S C N C --- K V N --- P K Y G F A K F Y L D E R N N ----- 517  
 OsZAS1b FV L R H R Y A Y Q V A D C S A C F G H E I A R --- P K F I G F A K L C L E E K Q I A T K --- Q I D R E D L I K V E Y H Q L A K N Q F C S V T F V 536  
 AtaZAS1b YV L P H K Y A Y A Q V A N S P A N L A G H H V V R --- P K F G F A K F O L H E K E D A T T K - - N K R E D R I K V Y H H L A R N Q F C S A T F V 589  
 OsZAS1c Y A L H H K Y A Y A Q V I D V Q S L E G C T V R --- P K F G F A K L H L Q D N N K V F ----- D L I N V E Y H H L K N Q F C S A T F V 510  
 BdZAS1c F A L H H S Y A Y A Q V V S T A S L A G C S T V R --- P K F G F A K L Y L E E A V S K Y S E - L A E K E D L I N V E Y H H L A N A N Q F C S A T F V 527  
 ZmZAS2 F M I Q N K Y Y A Q V A D S L E T S --- K T --- G L F K F N M I A K L H F D T P --- K E N E Q L I F V E Y H T L Q E Q Q F C S V Q F V 560  
 SbZAS2a F V I Q N K Y Y A Q V A D S L A T S --- K T --- G L F K F K M I A K L H F N M P D --- K K N --- 464  
 SbZAS2b F I I Q N K Y Y A Q V A D S L A T S --- K T --- G L F K F K M I A K L H F N M P D --- K E N K E L I S V E Y H T L K E Q F C S V Q F V 480  
 OsZAS2 F V I Q N N Y Y A Q V V D S V A T S --- E I --- G L F K Y N R I A K V H F D R Q D --- K E N K Q L K S V E Y H V L K E K T F C S V Q F V 533  
 ObZAS2 F V I E N K Y Y A Q V V D S V A T S --- K I --- G L F K Y N M I A K L H F D M E D --- K E N Q E L K L V E Y H V L P E K S F C S V Q F V 532  
 AcZAS2 F V I R N K Y A Y T Q V V D S L A T S --- N S I A L T K Y N M I A K L H F I K N - - - - E D D K N F I N V D Y H V L E E N H F C S V Q F V 533

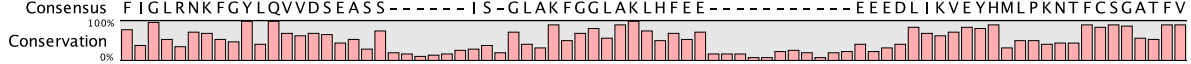

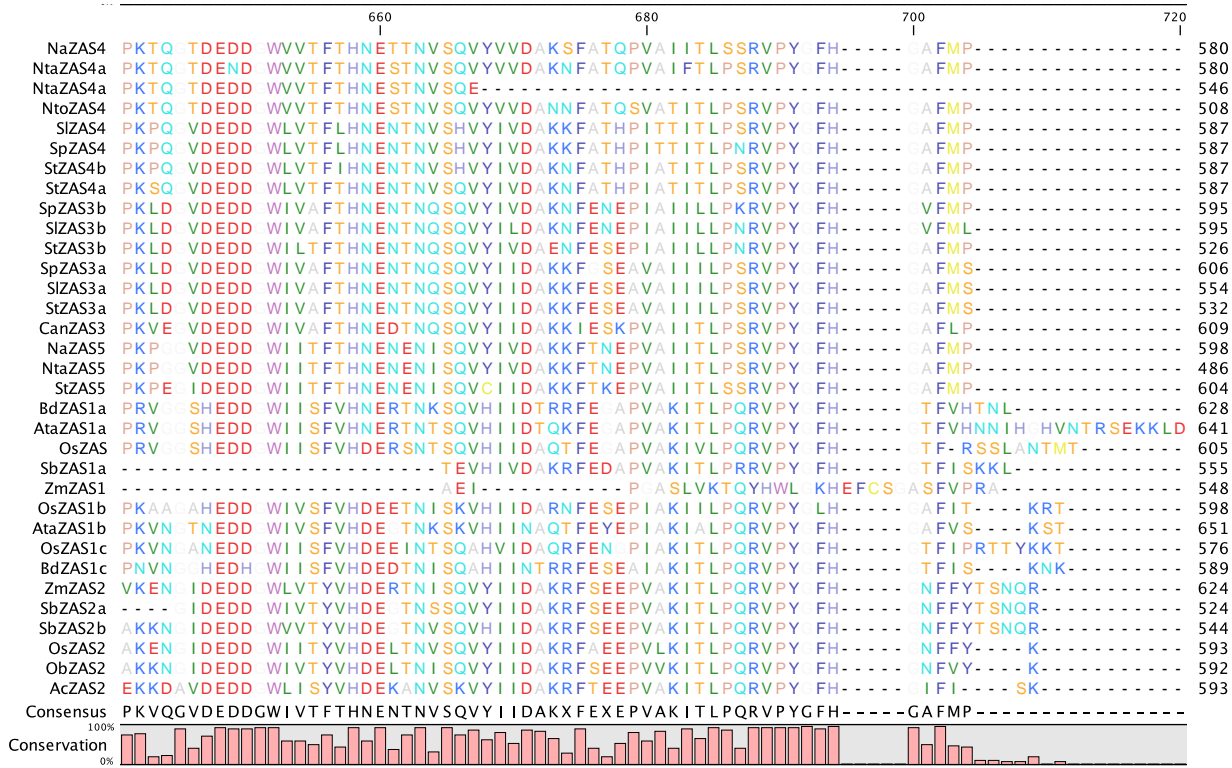

|           |             |     |
|-----------|-------------|-----|
| NaZAS4    | - L - - - - | 581 |
| NtaZAS4a  | - L - - - - | 581 |
| NtaZAS4a  | - - - - -   | 546 |
| NtoZAS4   | - S - - - - | 509 |
| SIZAS4    | - L - - - - | 588 |
| SpZAS4    | - L - - - - | 588 |
| StZAS4b   | - L - - - - | 588 |
| StZAS4a   | - L - - - - | 588 |
| SpZAS3b   | - FN L - -  | 598 |
| SIZAS3b   | - FN L - -  | 598 |
| StZAS3b   | - FN L - -  | 529 |
| SpZAS3a   | - FN - - -  | 608 |
| SIZAS3a   | - SN - - -  | 556 |
| StZAS3a   | - FN I P Y  | 537 |
| CanZAS3   | - FN L - -  | 612 |
| NaZAS5    | - LE - - S  | 601 |
| NtaZAS5   | - LE - - S  | 489 |
| StZAS5    | - LT - - S  | 607 |
| BdZAS1a   | - - - - -   | 628 |
| AtaZAS1a  | N L K F I Y | 647 |
| OsZAS     | - - - - -   | 605 |
| SbZAS1a   | - - - - I M | 557 |
| ZmZAS1    | - - - - -   | 549 |
| OsZAS1b   | - - - - -   | 598 |
| AtaZAS1b  | - - - - -   | 651 |
| OsZAS1c   | - - - - -   | 576 |
| BdZAS1c   | - - - - -   | 589 |
| ZmZAS2    | - - - - -   | 624 |
| SbZAS2a   | - - - - -   | 524 |
| SbZAS2b   | - - - - -   | 544 |
| OsZAS2    | - - - - -   | 593 |
| ObZAS2    | - - - - -   | 592 |
| AcZAS2    | - - - - -   | 593 |
| Consensus | - - - - -   |     |

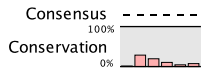

**Supplemental Table S1** Primer sequences used in this study.

---

| Experiment                   | Primer name                   | Sequence (5'–3')                                                 |                          |
|------------------------------|-------------------------------|------------------------------------------------------------------|--------------------------|
| RT-qPCR analyses             | UBQ-Q-F                       | GCCCAAGAAGAAGATCAAGAAC                                           |                          |
|                              | UBQ-Q-R                       | AGATAACAACGGAAGCATAAAAAGTC                                       |                          |
|                              | OsD27-Q-F                     | CTTCCAAGCTACATCCTCAC                                             |                          |
|                              | OsD27-Q-R                     | CCCAACCAACCAAGGAAA                                               |                          |
|                              | OsCCD7-Q-F                    | CAGTCTCCAAGCACAGATG                                              |                          |
|                              | OsCCD7-Q-R                    | GTTCTTTGGCACCTCTAGTT                                             |                          |
|                              | OsCCD8-Q-F                    | TGGCGATATCGATGGTGA                                               |                          |
|                              | OsCCD8-Q-R                    | GACCTCCTCGAACGTCTT                                               |                          |
|                              | OsCO-Q-F                      | ATTGTCAGCGATCCACTTC                                              |                          |
|                              | OsCO-Q-R                      | GCGCCGTTCTTAAAATTG                                               |                          |
|                              | OsZAS-Q-F                     | CAGCCAAAATCCACAGCCAC                                             |                          |
|                              | OsZAS-Q-R                     | AAGCCCTGTTTTGCTGTCT                                              |                          |
|                              | OsZAS1a-Q-F                   | GACCAAAAACGGTGCCATCC                                             |                          |
|                              | OsZAS1a-Q-R                   | CTCCCTTTCCAGTGGATGCT                                             |                          |
|                              | OsZAS1b-Q-F                   | GCAGCAGCTTACCACCAAAC                                             |                          |
|                              | OsZAS1b-Q-R                   | GTGCGAAATTGCTCTCGGTG                                             |                          |
|                              | OsZAS2-Q-F                    | CATCTAGGGAAGAGCCACG                                              |                          |
|                              | OsZAS2-Q-R                    | TGGCTGCTTATTCCACCCAG                                             |                          |
|                              | RiEF $\alpha$ -F              | GCTATTTTGATCATTGCCGCC                                            |                          |
|                              | RiEF $\alpha$ -R              | TCATTAACCGTTCTTCCGACC                                            |                          |
|                              | OSPt11-Q-F                    | GAGAAGTTCCTGCTCAAGCA                                             |                          |
|                              | OSPt11-Q-R                    | CATATCCCAGATGAGCGTATCATG                                         |                          |
|                              | RiPEIP1-Q-F                   | AAGAAAGTAAACGTGGGCT                                              |                          |
|                              | RiPEIP1-Q-R                   | TAACTCATCTCGGGACTG                                               |                          |
|                              | OsRubQ1-F                     | GGGTTACAAGTCTGCCTATTG                                            |                          |
|                              | OsRubQ1-R                     | ACGGGACACGACCAAGGA                                               |                          |
|                              | <i>Osas2</i> mutant screening | gOsZAS2-F                                                        | ACAAGCTCGAACTAGCAGGC     |
|                              |                               | gOsZAS2-R                                                        | GTTGCTCGTGCATTCACAAAT    |
|                              | <i>pOsZAS2:GUS</i> reporter   | pOsZAS2-F                                                        | TGTACGCGGCTGGCCTATTC     |
|                              |                               | pOsZAS2-F-CACC                                                   | CACCTGTACGCGGCTGGCCTATTC |
|                              | pOsZAS2-R                     | GGCTTGCTCAGGTTATTCGATCC                                          |                          |
| <i>In situ</i> hybridization | OsZAS2-mid-F                  | CTCCGCACCCTAGGACCTTA                                             |                          |
|                              | OsZAS2-mid-R                  | TAGGCATCACTCCAATGCGT                                             |                          |
|                              | OsZAS2-SP6-R                  | CTATTTAGGTGACACTATAGACTCCGCACCCTAGGACCTTA                        |                          |
|                              | M13-F                         | GTAACACGACGGCCAG                                                 |                          |
| <i>In vitro</i> assay        | OsZAS2-CDS-F                  | ATGTTCAGAGCTGGAGGT                                               |                          |
|                              | OsZAS2-CDS-R                  | TCACTTGTAGAAAAATTTCCATG                                          |                          |
|                              | OsZAS2-MBP-F                  | CCAGGGAGCAGCCTCGatgttcagagctggagggtgca                           |                          |
|                              | OsZAS2-MBP-R                  | GCAAAGCACCGCCTCGtactgtagaaaaatttccatgaaacccatat                  |                          |
| Subcellular localization     | OsZAS2-CDS-Box2-F             | GGGGACAAGTTTGTACAAAAAAGCAGGCTTAATGTTTCAGAGCTGGAGGGTG             |                          |
|                              | OsZAS2-CDS-Box2-R             | GGGGACCACTTTGTACAAGAAAGCTGGGTTCTTGAGAAAAATTTCCATGAAACCCATATGGAAC |                          |

---

**Supplemental Table S2** Distribution of ZAS members across monocot and dicot plants. Abbreviation: SN, shorten name of the species used in phylogenetic trees of this study. Columns from 4th to 8th represent numbers of Clade I-V orthologues in each species' genome. This table adopted from Wang et al., 2019.

| SN      | Species                                  | RefSeq Assembly Accession | Clade I | Clade II | Clade III | Clade IV | Clade V |
|---------|------------------------------------------|---------------------------|---------|----------|-----------|----------|---------|
| Monocot |                                          |                           |         |          |           |          |         |
| Os      | <i>Oryza sativa</i>                      | GCF_001433935.1           | 3       | 1        | 0         | 0        | 0       |
| Zm      | <i>Zea mays</i>                          | GCF_000005005.1           | 1       | 1        | 0         | 0        | 0       |
| Ob      | <i>Oryza brachyantha</i>                 | GCF_000231095.1           | 0       | 1        | 0         | 0        | 0       |
| Bd      | <i>Brachypodium distachyon</i>           | GCF_000005505.2           | 2       | 0        | 0         | 0        | 0       |
| Ata     | <i>Aegilops tauschii subsp. tauschii</i> | GCF_001957025.1           | 2       | 0        | 0         | 0        | 0       |
| Sb      | <i>Sorghum bicolor</i>                   | GCF_000003195.2           | 1       | 2        | 0         | 0        | 0       |
| Ac      | <i>Ananas comosus</i>                    | GCF_001540865.1           | 0       | 1        | 0         | 0        | 0       |
| Dicot   |                                          |                           |         |          |           |          |         |
| Na      | <i>Nicotiana attenuata</i>               | GCF_001879085.1           | 0       | 0        | 0         | 1        | 1       |
| Nto     | <i>Nicotiana tomentosiformis</i>         | GCF_000390325.2           | 0       | 0        | 0         | 1        | 0       |
| Nta     | <i>Nicotiana tabacum</i>                 | GCF_000715135.1           | 0       | 0        | 0         | 2        | 1       |
| Can     | <i>Capsicum annuum</i>                   | GCF_000710875.1           | 0       | 0        | 1         | 0        | 0       |
| St      | <i>Solanum tuberosum</i>                 | GCF_000226075.1           | 0       | 0        | 2         | 2        | 2       |
| Sp      | <i>Solanum pennellii</i>                 | GCF_001406875.1           | 0       | 0        | 2         | 1        | 0       |
| Sl      | <i>Solanum lycopersicum</i>              | GCF_000188115.3           | 0       | 0        | 2         | 1        | 0       |
|         |                                          |                           | 9       | 6        | 7         | 8        | 4       |

**Supplemental Table S3** Protein accession of ZAS members in different organisms.

| Clades    | Gene Symbol | Protein Accession (NCBI) |
|-----------|-------------|--------------------------|
| Clade I   | BdZAS1a     | XP_003576413.2           |
|           | AtaZAS1a    | XP_020201457.1           |
|           | OsZAS       | XP_015611401.1           |
|           | SbZAS1a     | XP_002462200.1           |
|           | ZmZAS1      | NP_001152477.1           |
|           | OsZAS1b     | XP_015648368.1           |
|           | AtaZAS1b    | XP_020149972.1           |
|           | OsZAS1c     | XP_015649272.1           |
|           | BdZAS1c     | XP_010235077.1           |
| Clade II  | ZmZAS2      | XP_008659260.1           |
|           | SbZAS2a     | XP_002437880.1           |
|           | SbZAS2b     | XP_002437880.1           |
|           | OsZAS2      | XP015641132.1            |
|           | ObZAS2      | XP_015693936.1           |
|           | AcZAS2      | XP_020098001.1           |
| Clade III | SpZAS3a     | XP_015058049.1           |
|           | SIZAS3a     | XP_019066509.1           |
|           | StZAS3a     | XP_015158838.1           |
|           | SpZAS3b     | XP_015057245.1           |
|           | SIZAS3b     | XP_004251419.1           |
|           | StZAS3b     | XP_015158843.1           |
|           | CanZAS3     | XP_016546962.1           |
| Clade IV  | NtoZAS4     | XP_009601557.1           |
|           | NtaZAS4a    | XP_016482181.1           |
|           | NaZAS4      | XP_019242827.1           |
|           | NtaZAS4a    | XP_016506620.1           |
|           | StZAS4a     | XP_006359778.1           |
|           | StZAS4b     | XP_006359779.1           |
|           | SIZAS4      | XP_004245397.1           |
|           | SpZAS4      | XP_015084337.1           |
| Clade V   | NaZAS5      | XP_019231151.1           |
|           | NtaZAS5     | XP_016506622.1           |
|           | StZAS5      | XP_006359776.1           |
